# Supplementary material for: What Is the Correlation between Clinical and Radiographic Findings in Patients with Advanced Osteoarthritis of the Knee?
Source: MDPI journal article supplement (doi:10.3390/jcm12165420), 2023-08-21
Supplement: s1 [file s1]

Supplementary Material.

**Table S1.** Spearman-Rho correlation coefficients between clinical and radiographic outcome measurements. Level of significance was set at  $p < 0.05$  and, if achieved, is written in bold letters, and marked with an asterisk (\*). In case of  $p < 0.001$  correlation is assumed to be highly significant and is marked with two asterisks (\*\*).

| Variable                                | Pain (VAS)      | OKS             | Knee<br>extension<br>deficit in ° | Maximum<br>flexion of<br>the knee in ° | ROM<br>absolute<br>value in ° | BMI            | K&L<br>tibiofemoral | Medial joint<br>space<br>narrowing | Lateral joint<br>space<br>narrowing | Medial<br>osteophyte | Lateral<br>osteophyte | Medial<br>attrition | Lateral<br>attrition | Patellofemo<br>ral joint<br>space<br>narrowing | Long leg<br>axis in ° |
|-----------------------------------------|-----------------|-----------------|-----------------------------------|----------------------------------------|-------------------------------|----------------|---------------------|------------------------------------|-------------------------------------|----------------------|-----------------------|---------------------|----------------------|------------------------------------------------|-----------------------|
| Pain (VAS)                              | 1               | -               | -                                 | -                                      | -                             | -              | -                   | -                                  | -                                   | -                    | -                     | -                   | -                    | -                                              | -                     |
| Oxford Knee Score                       | <b>-0.648**</b> | 1               | -                                 | -                                      | -                             | -              | -                   | -                                  | -                                   | -                    | -                     | -                   | -                    | -                                              | -                     |
| Knee extension deficit in °             | <b>0.209*</b>   | <b>-0.187*</b>  | 1                                 | -                                      | -                             | -              | -                   | -                                  | -                                   | -                    | -                     | -                   | -                    | -                                              | -                     |
| Max. flexion of the knee in °           | <b>-0.307**</b> | <b>0.229**</b>  | <b>-0.352**</b>                   | 1                                      | -                             | -              | -                   | -                                  | -                                   | -                    | -                     | -                   | -                    | -                                              | -                     |
| ROM absolute value in °                 | <b>-0.324**</b> | <b>0.248**</b>  | <b>-0.529**</b>                   | <b>0.977**</b>                         | 1                             | -              | -                   | -                                  | -                                   | -                    | -                     | -                   | -                    | -                                              | -                     |
| BMI                                     | 0.122           | <b>-0.187*</b>  | 0.085                             | <b>-0.285**</b>                        | <b>-0.276**</b>               | 1              | -                   | -                                  | -                                   | -                    | -                     | -                   | -                    | -                                              | -                     |
| K&L tibiofemoral                        | <b>0.258**</b>  | <b>-0.289**</b> | 0.169*                            | -0.167                                 | <b>-0.184*</b>                | 0.135          | 1                   | -                                  | -                                   | -                    | -                     | -                   | -                    | -                                              | -                     |
| Medial joint space narrowing            | 0.142           | <b>-0.207*</b>  | 0.068                             | -0.038                                 | -0.059                        | <b>0.191*</b>  | <b>0.526**</b>      | 1                                  | -                                   | -                    | -                     | -                   | -                    | -                                              | -                     |
| Lateral joint space narrowing           | 0.016           | -0.030          | <b>0.314**</b>                    | <b>-0.290**</b>                        | <b>-0.331**</b>               | -0.007         | -0.031              | <b>-0.444**</b>                    | 1                                   | -                    | -                     | -                   | -                    | -                                              | -                     |
| Medial osteophyte                       | 0.107           | -0.075          | <b>0.211*</b>                     | -0.144                                 | <b>-0.180*</b>                | <b>0.287**</b> | 0.117               | <b>0.368**</b>                     | 0.105                               | 1                    | -                     | -                   | -                    | -                                              | -                     |
| Lateral osteophyte                      | 0.013           | -0.016          | <b>0.290**</b>                    | <b>-0.303**</b>                        | <b>-0.337**</b>               | <b>0.181*</b>  | 0.029               | <b>-0.311**</b>                    | <b>0.717**</b>                      | <b>0.228**</b>       | 1                     | -                   | -                    | -                                              | -                     |
| Medial attrition                        | 0.089           | -0.043          | 0.073                             | -0.044                                 | -0.052                        | <b>0.172*</b>  | <b>0.217*</b>       | <b>0.684**</b>                     | <b>-0.287**</b>                     | <b>0.444**</b>       | -0.124                | 1                   | -                    | -                                              | -                     |
| Lateral attrition                       | -0.086          | 0.071           | 0.107                             | -0.147                                 | -0.144                        | -0.097         | 0.033               | <b>-0.633**</b>                    | <b>0.573**</b>                      | <b>-0.177*</b>       | <b>0.439**</b>        | <b>-0.515**</b>     | 1                    | -                                              | -                     |
| Patellofemoral joint space<br>narrowing | 0.148           | <b>-0.251**</b> | 0.136                             | -0.136                                 | -0.163                        | 0.095          | 0.112               | 0.089                              | 0.151                               | 0.150                | <b>0.168*</b>         | 0.036               | 0.070                | 1                                              | -                     |
| Long leg axis in °                      | -0.010          | 0.010           | -0.038                            | 0.076                                  | 0.075                         | 0.134          | <b>0.186*</b>       | <b>0.709**</b>                     | <b>-0.424**</b>                     | <b>0.350**</b>       | <b>-0.264**</b>       | <b>0.791**</b>      | <b>-0.663**</b>      | -0.119                                         | 1                     |
